# Supplementary material for: Effect of intramolecular charge transfer processes on amplified spontaneous emission of D–π–A type aggregation-enhanced emission molecules
Source: Royal Society of Chemistry journal article supplement (doi:10.1039/d2tc04683k), 2023-01-01
Supplement: d2tc04683k1.pdf [file d2tc04683k1.pdf]

## Supplementary Information

### **Effect of Intramolecular Charge Transfer Processes on Amplified Spontaneous Emission of D- $\pi$ -A Aggregation-Enhanced Emission Molecules**

*Yuanzhao Li<sup>1</sup>, Pengbo Han<sup>1</sup>, Xiaowei Zhang<sup>1</sup>, Jiadong Zhou<sup>1</sup>, Xianfeng Qiao<sup>1</sup>, Dezhi Yang<sup>1</sup>, Anjun Qin<sup>1\*</sup>, Ben Zhong Tang<sup>1,2\*</sup>, Junbiao Peng<sup>1\*</sup> and Dongge Ma<sup>1\*</sup>*

<sup>1</sup>Center for Aggregation-Induced Emission, Institute of Polymer Optoelectronic Materials and Devices, Guangdong Provincial Key Laboratory of Luminescence from Molecular Aggregates, Guangdong-Hong Kong-Macao Joint Laboratory of Optoelectronic and Magnetic Functional Materials, State Key Laboratory of Luminescent Materials and Devices, South China University of Technology, Guangzhou 510640, People's Republic of China,

E-mail: [msdgma@scut.edu.cn](mailto:msdgma@scut.edu.cn), [msqinaj@scut.edu.cn](mailto:msqinaj@scut.edu.cn), [psjbpeng@scut.edu.cn](mailto:psjbpeng@scut.edu.cn)

Prof. B. Z. Tang

<sup>2</sup>Shenzhen Institute of Molecular Aggregate Science and Engineering, School of Science and Engineering, The Chinese University of Hong Kong, Shenzhen, 2001 Longxiang Boulevard, Longgang District, Shenzhen City, Guangdong 518172, China

E-mail: [tangbenz@cuhk.edu.cn](mailto:tangbenz@cuhk.edu.cn)

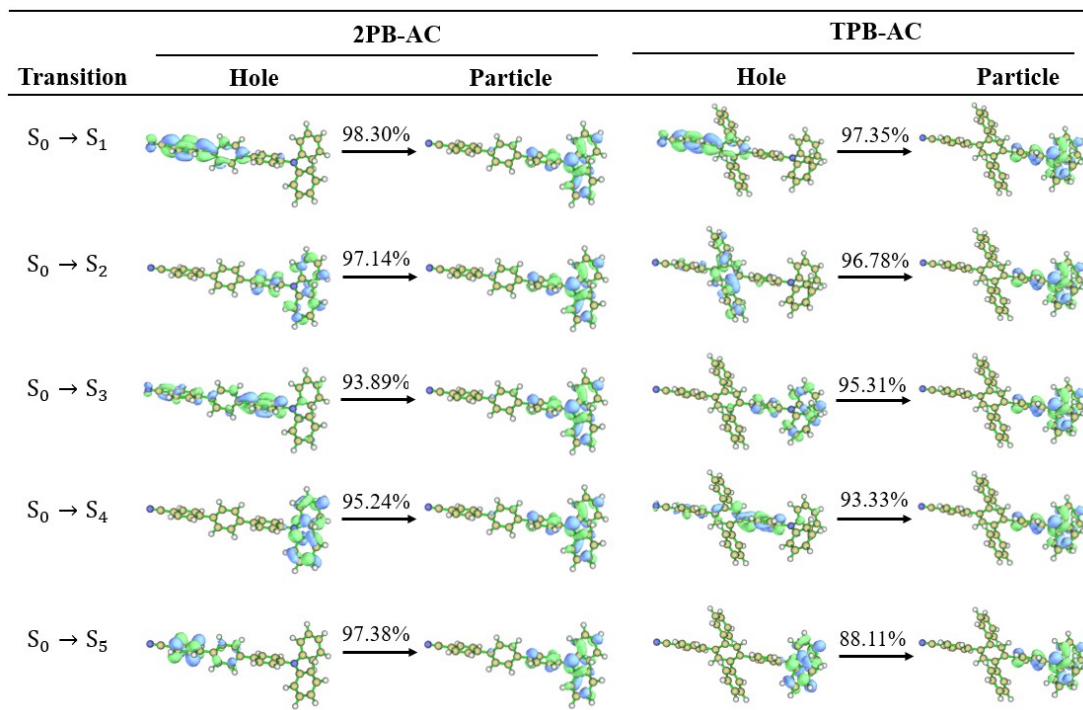

**Fig. S1** The calculated NTO distribution of singlet states of 2PB-AC and TPB-AC (Calculation accomplished by Multiwfn 3.3.8. [1]).

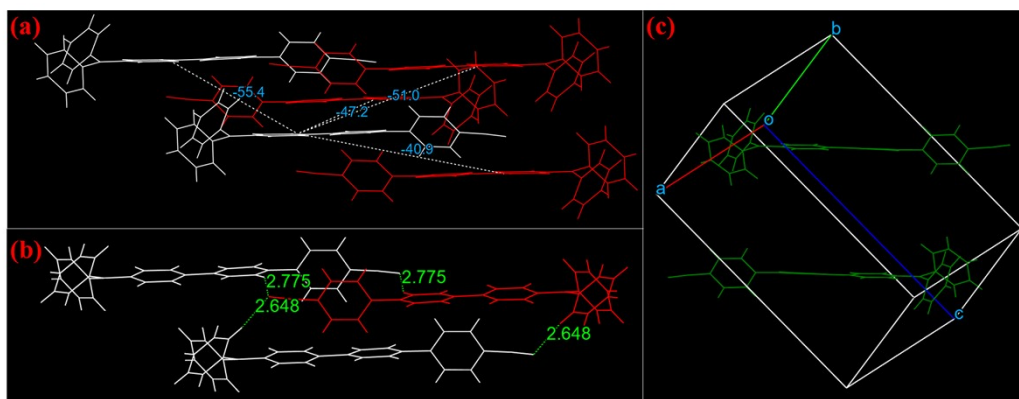

**Fig. S2** Single crystal structure of 2PB-AC. (a) First strongest molecular potentials, unit of  $\text{kJ mol}^{-1}$ . (b) Adjacent molecules distances of  $\text{CH}\cdots\text{N}$ , unit of  $\text{\AA}$ . (c) Unit cell.

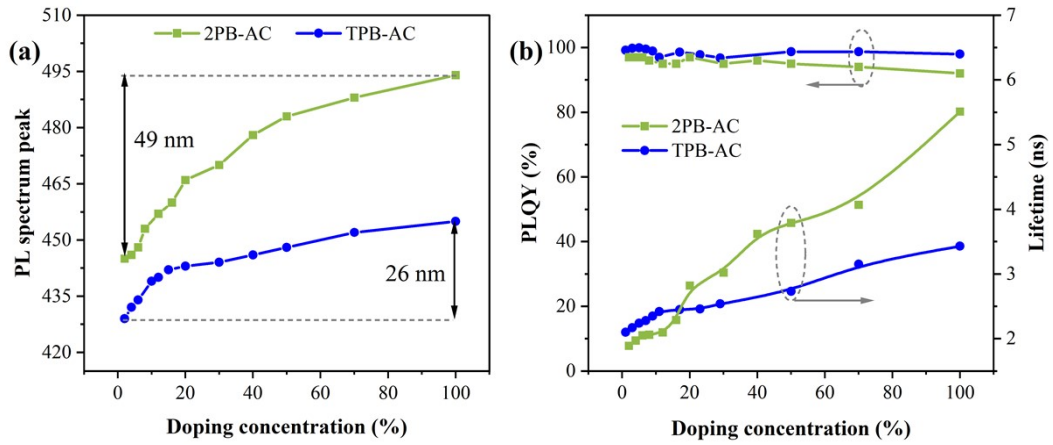

**Fig. S3** (a) PL peaks of 2PB-AC and TPB-AC as a function of doping concentration. (b) PL quantum efficiency values and excited state lifetimes of 2PB-AC and TPB-AC as a function of doping concentration.

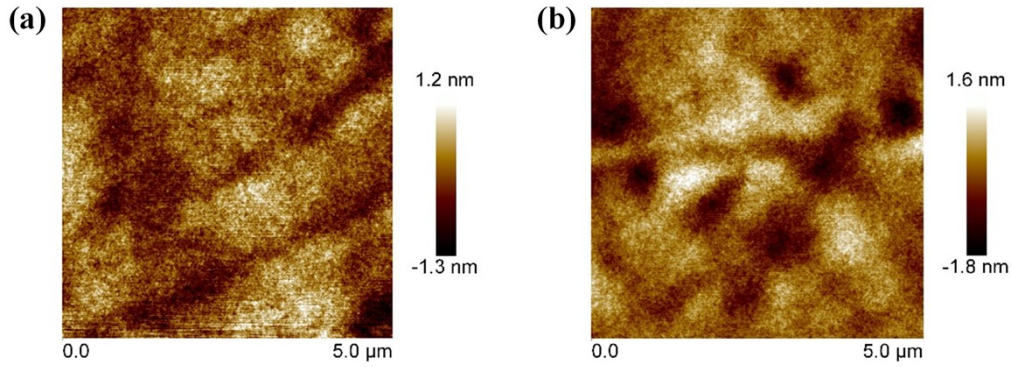

**Fig. S4** AFM images of (a) TPB-AC neat film and (b) 2PB-AC neat film.

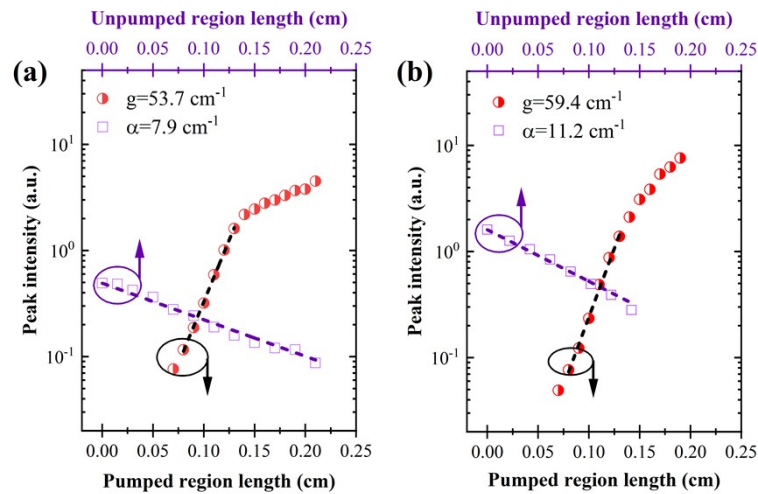

**Fig. S5** Loss coefficient (pink color) and net gain coefficient fitting of (a) TPB-AC neat film at the pump energy density of 24 μJ cm<sup>-2</sup> and (b) CBP:7wt%2PB-AC doped film at the pump energy density of 18 μJ cm<sup>-2</sup>.

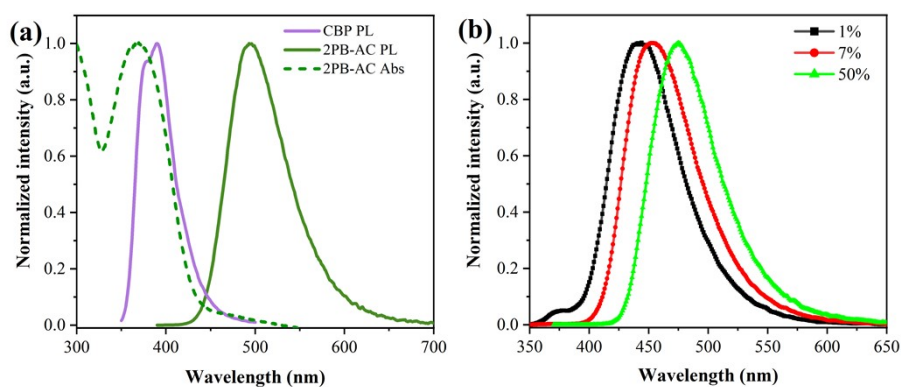

**Fig. S6** (a) Normalized absorption spectrum of 2PB-AC neat film (green color) and PL spectra of 2PB-AC (green color) and CBP (pink color) neat films. (b) Normalized PL spectra of CBP:2PB-AC doped films at different concentrations. The excitation wavelength is 350 nm.

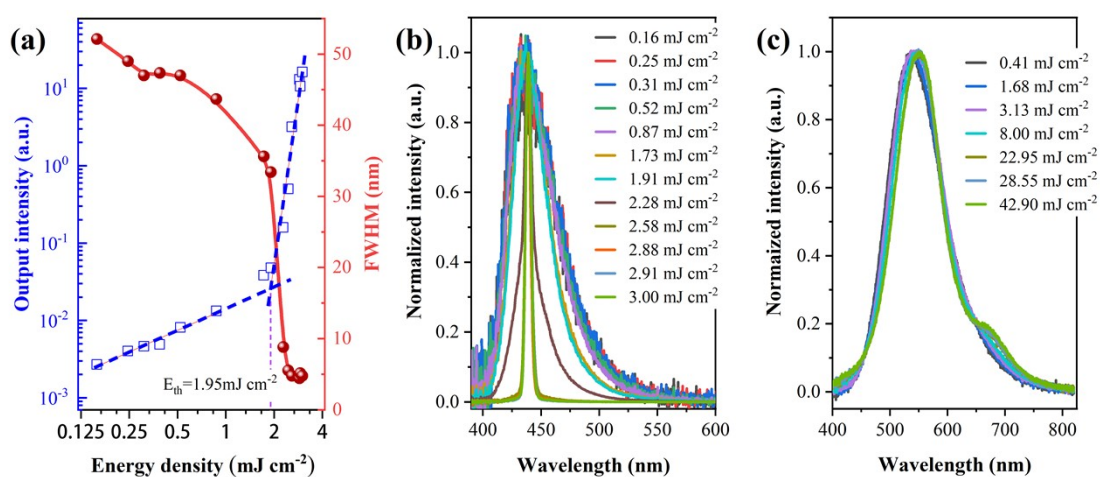

**Fig. S7** (a) Output intensity and spectrum FWHM of 2PB-AC in TOL as a function of the pumped energy density. Normalized emission spectra of (b) 2PB-AC in TOL and (c) 2PB-AC in DMF under different pumped energy densities.

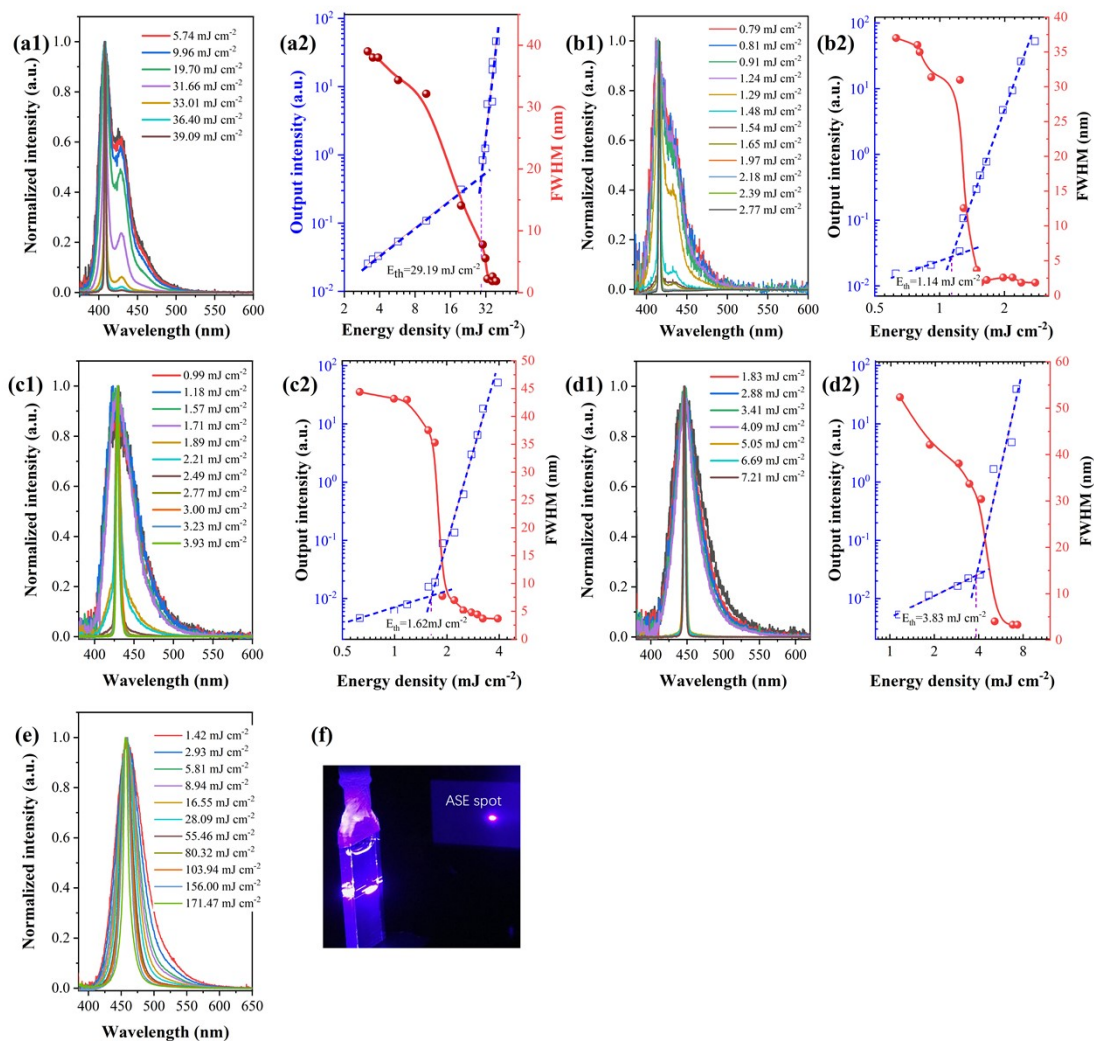

**Fig. S8** PL intensity and FWHM of spectra as a function of the pumped energy density and the normalized PL spectra under different pumped energy densities in 2PB-AC mixed solutions (0.25 mg/ml): (a1), (a2)  $V_{HEX}:V_{TOL} = 10:0$  (saturated solution, smaller than 0.25 mg/ml); (b1), (b2)  $V_{HEX}:V_{TOL} = 8:2$ ; (c1), (c2)  $V_{HEX}:V_{TOL} = 1:1$ ; (d1), (d2)  $V_{HEX}:V_{CB} = 1:1$ ; (e)  $V_{HEX}:V_{CB} = 2:8$ . (f) Photograph of ASE spot for  $V_{HEX}:V_{TOL} = 8:2$  solution when pumped density exceeding ASE threshold.

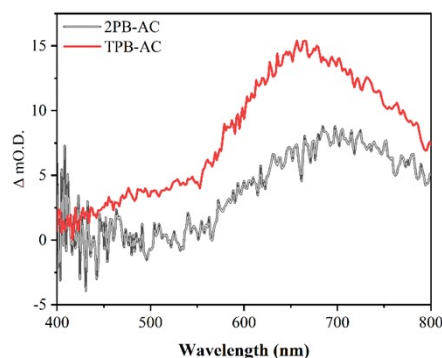

**Fig. S9** Triplet absorption spectra of 2PB-AC and TPB-AC, measured at the degassed solutions (excitation wavelength: 343 nm)

**Table S1.** Energy levels of singlet and triplet states and oscillator strengths of singlet states in 2PB-AC and TPB-AC

| Excited States | 2PB-AC              |                     |                       | TPB-AC              |                     |                       |
|----------------|---------------------|---------------------|-----------------------|---------------------|---------------------|-----------------------|
|                | S energy level (eV) | T energy level (eV) | S Oscillator Strength | S energy level (eV) | T energy level (eV) | S Oscillator Strength |
| 1              | 2.9943              | 2.5691              | 0.5113                | 3.0491              | 2.6976              | 0.2847                |
| 2              | 3.6246              | 3.0705              | 0.0123                | 3.5404              | 3.0698              | 0.0060                |
| 3              | 3.7940              | 3.1453              | 0.3832                | 3.6445              | 3.1354              | 0.0132                |
| 4              | 3.8925              | 3.3044              | 0.1791                | 3.7316              | 3.2811              | 0.3634                |
| 5              | 3.9917              | 3.3533              | 0.0009                | 3.8920              | 3.2988              | 0.1238                |
| 6              | 4.1090              | 3.6027              | 0.0011                | 3.9147              | 3.3387              | 0.1606                |
| 7              | 4.1639              | 3.7984              | 0.5949                | 4.0006              | 3.5468              | 0.0090                |
| 8              | 4.2986              | 3.8533              | 0.0239                | 4.1890              | 3.6422              | 0.0285                |
| 9              | 4.3099              | 3.8808              | 0.0045                | 4.2946              | 3.6930              | 0.0114                |
| 10             | 4.6017              | 3.9009              | 0.0010                | 4.3071              | 3.8146              | 0.1362                |

**Table S2.** Photophysical parameters of 2PB-AC and TPB-AC in different solvents.

|     | 2PB-AC  |                          |                         |                  |                   |                               | TPB-AC  |                          |                         |                  |                   |                               |
|-----|---------|--------------------------|-------------------------|------------------|-------------------|-------------------------------|---------|--------------------------|-------------------------|------------------|-------------------|-------------------------------|
|     | Abs /nm | $\lambda_{PL}^{(a)}$ /nm | fwhm <sup>(b)</sup> /nm | $\tau^{(c)}$ /ns | $\Phi_{PL}^{(d)}$ | $k_r^{(e)}$ /ns <sup>-1</sup> | Abs /nm | $\lambda_{PL}^{(a)}$ /nm | fwhm <sup>(b)</sup> /nm | $\tau^{(c)}$ /ns | $\Phi_{PL}^{(d)}$ | $k_r^{(e)}$ /ns <sup>-1</sup> |
| HEX | 354     | 408                      | 44                      | 1.37             | 0.71              | 0.52                          | 344     | 408                      | 56                      | 1.56             | 0.66              | 0.42                          |
| TOL | 359     | 436                      | 59                      | 1.60             | 0.85              | 0.53                          | 347     | 437                      | 63                      | 2.12             | 0.81              | 0.38                          |
| THF | 355     | 474                      | 88                      | 2.43             | 0.85              | 0.35                          | 343     | 483                      | 90                      | 3.44             | 0.85              | 0.25                          |
| DCM | 356     | 491                      | 96                      | 2.82             | 0.97              | 0.34                          | 343     | 495                      | 97                      | 4.08             | 0.94              | 0.23                          |
| DMF | 351     | 527                      | 132                     | 3.54             | 0.82              | 0.23                          | 339     | 544                      | 135                     | 5.28             | 0.77              | 0.15                          |

<sup>(a)</sup> Peak wavelength of the PL spectrum, excitation wavelength at 355 nm; <sup>(b)</sup> full width at half-maximum of the PL spectrum; <sup>(c)</sup> Excitation wavelength at 375 nm and probe wavelength at the peak wavelength of the PL spectrum; <sup>(d)</sup> Excitation wavelength at 330 nm; <sup>(e)</sup>  $k_r = \Phi_{PL}/\tau$ .

**Table S3.** Photophysical parameters of 2PB-AC and TPB-AC films in different doping concentration.

|    | 2PB-AC              |                          |                     |                   |                      | TPB-AC                   |                     |                          |                     |                   |                      |
|----|---------------------|--------------------------|---------------------|-------------------|----------------------|--------------------------|---------------------|--------------------------|---------------------|-------------------|----------------------|
|    | C <sup>(a)</sup> /% | $\lambda_{PL}^{(b)}$ /nm | $\Phi_{PL}^{(c)}$ % | $\tau^{(d)}$ (ns) | kr/ ns <sup>-1</sup> | knr*10 /ns <sup>-1</sup> | C <sup>(a)</sup> /% | $\lambda_{PL}^{(b)}$ /nm | $\Phi_{PL}^{(c)}$ % | $\tau^{(d)}$ (ns) | kr/ ns <sup>-1</sup> |
| 2  | 445                 | 97                       | 1.89                | 0.51              | 0.16                 | 1                        | 425                 | 99                       | 2.10                | 0.47              | 0.38                 |
| 4  | 449                 | 97                       | 1.97                | 0.49              | 0.15                 | 3                        | 429                 | 99                       | 2.17                | 0.46              | 0.09                 |
| 6  | 451                 | 97                       | 2.05                | 0.47              | 0.15                 | 5                        | 432                 | 99                       | 2.24                | 0.45              | 0.04                 |
| 8  | 453                 | 96                       | 2.06                | 0.47              | 0.19                 | 7                        | 433                 | 99                       | 2.28                | 0.44              | 0.22                 |
| 12 | 457                 | 95                       | 2.10                | 0.45              | 0.24                 | 9                        | 439                 | 98                       | 2.35                | 0.42              | 0.47                 |
| 16 | 464                 | 95                       | 2.29                | 0.42              | 0.22                 | 11                       | 442                 | 97                       | 2.42                | 0.40              | 1.24                 |

|     |     |    |                                                 |      |      |     |     |    |                                                 |      |      |
|-----|-----|----|-------------------------------------------------|------|------|-----|-----|----|-------------------------------------------------|------|------|
| 20  | 466 | 97 | 2.82 <sup>(e)</sup><br>2.15(0.74)<br>4.71(0.26) | 0.34 | 0.11 | 17  | 444 | 99 | 2.45                                            | 0.40 | 0.57 |
| 30  | 470 | 95 | 3.02 <sup>(e)</sup><br>1.99(0.52)<br>4.13(0.48) | 0.31 | 0.17 | 23  | 445 | 98 | 2.46                                            | 0.40 | 0.89 |
| 40  | 478 | 96 | 3.62 <sup>(e)</sup><br>2.55(0.71)<br>6.29(0.29) | 0.27 | 0.11 | 29  | 445 | 97 | 2.54                                            | 0.38 | 1.26 |
| 50  | 483 | 95 | 3.79 <sup>(e)</sup><br>2.5(0.63)<br>5.96(0.37)  | 0.25 | 0.13 | 50  | 449 | 99 | 2.73                                            | 0.36 | 0.48 |
| 70  | 488 | 94 | 4.07 <sup>(e)</sup><br>2.36(0.45)<br>5.55(0.54) | 0.23 | 0.15 | 70  | 452 | 98 | 3.15 <sup>(e)</sup><br>2.43(0.72)<br>4.98(0.28) | 0.31 | 0.41 |
| 100 | 493 | 93 | 5.51 <sup>(e)</sup><br>3.30(0.72)<br>10.2(0.28) | 0.17 | 0.15 | 100 | 455 | 98 | 3.43 <sup>(e)</sup><br>2.5(0.69)<br>5.49(0.31)  | 0.29 | 0.58 |

<sup>(a)</sup> Doping concentration; <sup>(b)</sup>, <sup>(c)</sup> Excitation wavelength at 330 nm; <sup>(d)</sup> Excitation wavelength at 375 nm and probe wavelength at the peak wavelength of the PL spectrum; <sup>(e)</sup> Average lifetime,  $\tau_{AVE} = \frac{\sum A_i \tau_i^2}{\sum A_i \tau_i}$ .

**Table S4.** ASE performance parameters of 2PB-AC: CBP (x: 100-x, in weight) doped films.

| Doping ratio (%) | $E_{th}$ ( $\mu\text{J cm}^{-2}$ ) | $\lambda_{ASE}$ (nm) | FWHM (nm) |
|------------------|------------------------------------|----------------------|-----------|
| 1                | 3.85                               | 444                  | 7.7       |
| 3                | 2.45                               | 450                  | 7.7       |
| 5                | 1.31                               | 453                  | 6.6       |
| 7                | 1.06                               | 453                  | 7.0       |
| 9                | 1.21                               | 455                  | 5.9       |
| 17               | 3.91                               | 460                  | 7.3       |
| 23               | 4.41                               | 461                  | 6.6       |
| 29               | 5.56                               | 462                  | 6.9       |
| 33               | 8.49                               | 462                  | 6.6       |
| 50               | 8.45                               | 463                  | 5.5       |
| 70               | 27.14                              | 464                  | 5.1       |

**Table S5.** ASE performance parameters of 2PB-AC in different solvents.

|                             | <b>a</b> <sup>[1]</sup> | <b>b</b> | <b>c</b> | <b>d</b> | <b>e</b> | <b>f</b> |
|-----------------------------|-------------------------|----------|----------|----------|----------|----------|
| $\lambda_{ASE}/(\text{nm})$ | 408                     | 416      | 430      | 439      | 446      | 456      |
| FWHM/(nm)                   | 1.8                     | 1.8      | 3.7      | 4.4      | 3.6      | 8.8      |
| $E_{th}(\text{mJ cm}^{-2})$ | 29.2                    | 1.14     | 1.62     | 1.95     | 3.83     | >100     |

<sup>[1]</sup> Saturated solution.

## Reference

- [1] T. Lu, F. W. Chen. Multiwfn: A multifunctional wavefunction analyzer. *J. Comput. Chem.*, **2012**, 33(5):580-92.
